# Supplementary material
Source: PubMed Central journal article supplement (PMC3774034)
Supplement: NIHMS490685-supplement-supplemental_material.pdf [file NIHMS490685-supplement-supplemental_material.pdf]

| <i>Pathway</i>                 | <i>SIZE</i> | <i>p-value</i> |
|--------------------------------|-------------|----------------|
| <b>MCD</b>                     |             |                |
| <i>vs. NCKD</i>                |             |                |
| ADDYA_K562_HEMIN_TREATMENT     | 70          | 0.00           |
| CMV_ALL_UP                     | 90          | 0.01           |
| HDACI_COLON_CUR_UP             | 99          | 0.01           |
| WANG_MLL_CBP_VS_GMP_DN         | 38          | 0.01           |
| PROTEASOME_DEGRADATION         | 31          | 0.01           |
| UBIQUITIN_MEDIATED_PROTEOLYSIS | 22          | 0.02           |
| KNUDSEN_PMNS_UP                | 74          | 0.02           |
| TNFALPHA_4HRS_UP               | 39          | 0.02           |
| HDACI_COLON_CURSUL_UP          | 37          | 0.02           |
| HDACI_COLON_SUL24HRS_UP        | 55          | 0.03           |
| APOPTOSIS_KEGG                 | 49          | 0.03           |
| NING_COPD_DN                   | 111         | 0.03           |
| TARTE_PC                       | 80          | 0.03           |
| HDACI_COLON_CUR2HRS_UP         | 26          | 0.04           |
| AGEING_BRAIN_DN                | 119         | 0.04           |
| UVB_NHEK3_CO                   | 82          | 0.04           |
| CIRCADIAN_EXERCISE             | 40          | 0.04           |
| PASSERINI_INFLAMMATION         | 24          | 0.04           |
| HDACI_COLON_CUR48HRS_UP        | 60          | 0.04           |
| ROS_MOUSE_AORTA_DN             | 69          | 0.04           |
| GENOTOXINS_24HRS_DISCR         | 35          | 0.05           |
| ZHAN_MMPC_SIM                  | 42          | 0.05           |
| NADLER_OBESITY_UP              | 50          | 0.05           |
| TSA_HEPATOMA_UP                | 33          | 0.05           |
| LAL_KO_3MO_UP                  | 42          | 0.05           |
| <i>vs. LFD</i>                 |             |                |
| IFNALPHA_NL_HCC_UP             | 18          | 0.00           |
| ST_ERK1_ERK2_MAPK_PATHWAY      | 29          | 0.01           |
| APOPTOSIS_KEGG                 | 49          | 0.02           |
| IFNALPHA_HCC_UP                | 29          | 0.02           |
| IFNALPHA_NL_UP                 | 27          | 0.02           |
| CMV_HCMV_TIMECOURSE_12HRS_UP   | 26          | 0.03           |
| MAPK_CASCADE                   | 29          | 0.04           |
| CMV_8HRS_UP                    | 31          | 0.05           |
| TARTE_PC                       | 80          | 0.05           |
| ST_FAS_SIGNALING_PATHWAY       | 59          | 0.05           |
| RADAEVA_IFNA_UP                | 50          | 0.05           |

| <i>Diet</i> | <i>Pathway</i>                        | <i>SIZE</i> | <i>p-value</i> |
|-------------|---------------------------------------|-------------|----------------|
| <b>NCKD</b> |                                       |             |                |
|             | <i>vs. MCD</i>                        |             |                |
|             | REFRACTORY_GASTRIC_UP                 | 87          | 0.00           |
|             | GAMMA_ESR_WS_UNREG                    | 26          | 0.00           |
|             | HSC_LTHSC_ADULT                       | 286         | 0.00           |
|             | 4NQO_ESR_WS_UNREG                     | 33          | 0.00           |
|             | BRCA_ER_POS                           | 478         | 0.00           |
|             | HSC_LTHSC_SHARED                      | 210         | 0.00           |
|             | HSC_LTHSC_FETAL                       | 210         | 0.00           |
|             | BRENTANI_PROTEIN_MODIFICATION         | 142         | 0.00           |
|             | KNUDSEN_PMNS_DN                       | 225         | 0.01           |
|             | STEFFEN_AML_PML_PLZF_TRGT             | 42          | 0.01           |
|             | NO2IL12PATHWAY                        | 15          | 0.01           |
|             | IL6_FIBRO_UP                          | 47          | 0.01           |
|             | UV_ESR_OLD_UNREG                      | 16          | 0.01           |
|             | BIOPEPTIDSPATHWAY                     | 38          | 0.01           |
|             | TPA_SENS_MIDDLE_DN                    | 299         | 0.01           |
|             | ALZHEIMERS_INCIPIENT_UP               | 338         | 0.01           |
|             | TPA_SENS_LATE_DN                      | 232         | 0.01           |
|             | GAMMA_ESR_OLD_UNREG                   | 24          | 0.01           |
|             | ESR_FIBROBLAST_DN                     | 15          | 0.01           |
|             | PHOSPHATIDYLINOSITOL_SIGNALING_SYSTEM | 88          | 0.01           |
|             | HSC_HSCANDPROGENITORS_ADULT           | 459         | 0.02           |
|             | HSC_HSCANDPROGENITORS_SHARED          | 452         | 0.02           |
|             | HSC_HSCANDPROGENITORS_FETAL           | 452         | 0.02           |
|             | REOVIRUS_HEK293_DN                    | 230         | 0.02           |
|             | SPPAPATHWAY                           | 20          | 0.02           |
|             | PTDINSPATHWAY                         | 20          | 0.02           |
|             | CALCIUM_REGULATION_IN_CARDIAC_CELLS   | 127         | 0.02           |
|             | GILDEA_BLADDER_UP                     | 30          | 0.02           |
|             | SIG_CHEMOTAXIS                        | 42          | 0.02           |
|             | ASTIER_FN_DIFF                        | 61          | 0.02           |
|             | IL7PATHWAY                            | 16          | 0.02           |
|             | IL6_SCAR_FIBRO_UP                     | 24          | 0.02           |
|             | BCL2_FAMILY_AND_REG_NETWORK           | 21          | 0.02           |
|             | PYK2PATHWAY                           | 27          | 0.02           |
|             | ASTIER_BCELL                          | 60          | 0.02           |
|             | MEF2DPATHWAY                          | 18          | 0.02           |
|             | UVB_NHEK3_C5                          | 35          | 0.03           |
|             | ST_INTERLEUKIN_4_PATHWAY              | 26          | 0.03           |
|             | UVC_LOW_ALL_DN                        | 58          | 0.03           |
|             | CMV_HCMV_TIMECOURSE_4HRS_DN           | 35          | 0.03           |
|             | ALCALAY_AML_NPMC_UP                   | 139         | 0.03           |

| <b>Diet</b> | <b>Pathway</b>                | <b>SIZE</b> | <b>p-value</b> |
|-------------|-------------------------------|-------------|----------------|
|             | PITX2PATHWAY                  | 16          | 0.03           |
|             | TGFBETA_C5_UP                 | 17          | 0.03           |
|             | TPA_RESIST_EARLY_UP           | 30          | 0.03           |
|             | GLYCOGEN                      | 19          | 0.03           |
|             | YE_INTRAMETASTATIC_HCC_UP     | 21          | 0.03           |
|             | HDACI_COLON_CUR_DN            | 38          | 0.04           |
|             | CHANG_SERUM_RESPONSE_DN       | 112         | 0.04           |
|             | ST_WNT_CA2_CYCLIC_GMP_PATHWAY | 19          | 0.04           |
|             | PASSERINI_PROLIFERATION       | 63          | 0.04           |
|             | IL2RBPATHWAY                  | 34          | 0.04           |
|             | IL2PATHWAY                    | 22          | 0.04           |
|             | MYOD_NIH3T3_UP                | 75          | 0.04           |
|             | ZHAN_MM_CD138_MF_VS_REST      | 42          | 0.04           |
|             | GHPATHWAY                     | 27          | 0.04           |
|             | OLD_FIBRO_DN                  | 147         | 0.04           |
|             | UVB_NHEK1_DN                  | 270         | 0.04           |
|             | PDGFPATHWAY                   | 27          | 0.04           |
|             | ST_ADRENERGIC                 | 33          | 0.05           |
|             | CALCINEURIN_NF_AT_SIGNALING   | 91          | 0.05           |
|             | CARM_ERPATHWAY                | 26          | 0.05           |
|             | SIG_BCR_SIGNALING_PATHWAY     | 44          | 0.05           |
|             | UV-4NQO_FIBRO_DN              | 28          | 0.05           |
|             | FALT_BCLL_UP                  | 44          | 0.05           |
|             | EGFPATHWAY                    | 27          | 0.05           |
|             | ET743_HELA_DN                 | 15          | 0.05           |
|             | CMV_HCMV_TIMECOURSE_ALL_DN    | 420         | 0.05           |
|             |                               |             |                |
|             | <i>vs. LFD</i>                |             |                |
|             |                               |             |                |
|             | TPA_SKIN_DN                   | 15          | 0.00           |
|             | ESR_FIBROBLAST_DN             | 15          | 0.01           |
|             | UVB_NHEK3_C5                  | 35          | 0.02           |
|             | HALMOS_CEBP_UP                | 50          | 0.02           |
|             | GHPATHWAY                     | 27          | 0.02           |
|             | PYK2PATHWAY                   | 27          | 0.02           |
|             | TNFALPHA_TGZ_ADIP_DN          | 25          | 0.02           |
|             | BIOPEPTIDESPATHWAY            | 38          | 0.03           |
|             | NKCELLSPATHWAY                | 18          | 0.03           |
|             | UVC_XPCS_ALL_UP               | 61          | 0.04           |
|             | BYSTRYKH_HSC_CIS_GLOCUS       | 91          | 0.04           |
|             | CMV_HCMV_TIMECOURSE_14HRS_DN  | 41          | 0.04           |
|             | NDKDYNAMINPATHWAY             | 17          | 0.05           |
|             | CMV_HCMV_TIMECOURSE_1HR_DN    | 38          | 0.05           |
|             |                               |             |                |

| <i>Diet</i> | <i>Pathway</i>                   | <i>SIZE</i> | <i>p-value</i> |
|-------------|----------------------------------|-------------|----------------|
| <b>LFD</b>  |                                  |             |                |
|             | <i>vs. MCD</i>                   |             |                |
|             | HDACI_COLON_CUR24HRS_DN          | 17          | 0.00           |
|             | STEFFEN_AML_PML_PLZF_TRGT        | 42          | 0.00           |
|             | HDACI_COLON_CUR_DN               | 38          | 0.00           |
|             | PASSERINI_PROLIFERATION          | 63          | 0.00           |
|             | BRENTANI_PROTEIN_MODIFICATION    | 142         | 0.00           |
|             | TPA_SENS_MIDDLE_DN               | 299         | 0.00           |
|             | OKUMURA_MC_LPS                   | 185         | 0.00           |
|             | PENG_GLUCOSE_UP                  | 33          | 0.01           |
|             | ZHAN_MM_MOLECULAR_CLASSI_DN      | 41          | 0.01           |
|             | NOVA2_KO_SPLICING                | 41          | 0.01           |
|             | SIG_BCR_SIGNALING_PATHWAY        | 44          | 0.01           |
|             | UVC_LOW_ALL_DN                   | 58          | 0.01           |
|             | EGFPATHWAY                       | 27          | 0.01           |
|             | GAMMA_ESR_WS_UNREG               | 26          | 0.01           |
|             | BCNU_GLIOMA_MGMT_48HRS_UP        | 18          | 0.01           |
|             | TPA_RESIST_EARLY_UP              | 30          | 0.01           |
|             | BIOPEPTIDSPATHWAY                | 38          | 0.01           |
|             | NGUYEN_KERATO_DN                 | 80          | 0.01           |
|             | IGF_VS_PDGF_DN                   | 34          | 0.01           |
|             | RORIE_ES_PNET_DN                 | 27          | 0.01           |
|             | SPPAPATHWAY                      | 20          | 0.01           |
|             | UVC_LOW_C3_DN                    | 19          | 0.02           |
|             | P53_SIGNALING                    | 91          | 0.02           |
|             | HSC_HSCANDPROGENITORS_ADULT      | 459         | 0.02           |
|             | HOFFMANN_BIVSBII_IMVM            | 75          | 0.02           |
|             | HIPPOCAMPUS_DEVELOPMENT_NEONATAL | 26          | 0.02           |
|             | AGUIRRE_PANCREAS_CHR1            | 31          | 0.02           |
|             | G1PATHWAY                        | 25          | 0.02           |
|             | G_PROTEIN_SIGNALING              | 86          | 0.02           |
|             | UVC_TTD-XPCS_COMMON_UP           | 21          | 0.02           |
|             | MEF2DPATHWAY                     | 18          | 0.02           |
|             | INSULIN_ADIP_INSENS_UP           | 20          | 0.02           |
|             | CHESLER_BRAIN_ONLY_SUBSET        | 23          | 0.02           |
|             | CALRES_MOUSE_UP                  | 28          | 0.02           |
|             | CMV_HCMV_TIMECOURSE_20HRS_DN     | 40          | 0.02           |
|             | CMV_HCMV_TIMECOURSE_18HRS_DN     | 21          | 0.02           |
|             | PDGFPATHWAY                      | 27          | 0.03           |
|             | STEMCELL_COMMON_DN               | 55          | 0.03           |
|             | HSC_HSCANDPROGENITORS_SHARED     | 452         | 0.03           |
|             | HSC_HSCANDPROGENITORS_FETAL      | 452         | 0.03           |
|             | CMV_HCMV_TIMECOURSE_10HRS_DN     | 15          | 0.03           |

| <i>Diet</i> | <i>Pathway</i>                        | <i>SIZE</i> | <i>p-value</i> |
|-------------|---------------------------------------|-------------|----------------|
|             | CELL_CYCLE_ARREST                     | 31          | 0.03           |
|             | UV-CMV_UNIQUE_HCMV_6HRS_DN            | 81          | 0.03           |
|             | PITUITARY_FETAL_UP                    | 15          | 0.03           |
|             | BRCA1_OVEREXP_PROSTATE_DN             | 77          | 0.03           |
|             | 4NQO_ESR_WS_UNREG                     | 33          | 0.03           |
|             | ABBUD_LIF_DN                          | 22          | 0.03           |
|             | KUMAR_HOXA_DIFF                       | 313         | 0.03           |
|             | TPOPATHWAY                            | 23          | 0.04           |
|             | CMV-UV_HCMV_6HRS_DN                   | 107         | 0.04           |
|             | ADIP_DIFF_CLUSTER1                    | 55          | 0.04           |
|             | CCR3PATHWAY                           | 22          | 0.04           |
|             | MYOD_BRG1_UP                          | 27          | 0.04           |
|             | PHOSPHATIDYLINOSITOL_SIGNALING_SYSTEM | 88          | 0.04           |
|             | EPOPATHWAY                            | 19          | 0.04           |
|             | ETSPATHWAY                            | 15          | 0.04           |
|             | RUIZ_TENASCIN_TARGETS                 | 79          | 0.04           |
|             | VEGF_HUVEC_30MIN_UP                   | 24          | 0.04           |
|             | METPATHWAY                            | 33          | 0.04           |
|             | IFN_BETA_UP                           | 65          | 0.05           |
|             | BCRPATHWAY                            | 34          | 0.05           |
|             | NUMATA_G_CSF_DIFF                     | 18          | 0.05           |
|             | TSA_RKO_UP                            | 17          | 0.05           |
|             | UVC_TTD_8HR_UP                        | 23          | 0.05           |
|             | ST_G_ALPHA_I_PATHWAY                  | 34          | 0.05           |
|             | INTEGRINPATHWAY                       | 32          | 0.05           |
|             | IL6_SCAR_FIBRO_UP                     | 24          | 0.05           |
|             | STRESS_GENOTOXIC_SPECIFIC_DN          | 39          | 0.05           |
|             | LINDSTEDT_DEND_8H_VS_48H_DN           | 67          | 0.05           |
|             | UVB_NHEK1_C6                          | 130         | 0.05           |
|             | AGUIRRE_PANCREAS_CHR22                | 60          | 0.05           |
|             | CMV_HCMV_TIMECOURSE_ALL_DN            | 420         | 0.05           |
|             | UVC_TTD_4HR_DN                        | 297         | 0.05           |
|             | GALACTOSE_METABOLISM                  | 23          | 0.05           |
|             |                                       |             |                |
|             | <i>vs. NCKD</i>                       |             |                |
|             | CHESLER_BRAIN_ONLY_SUBSET             | 23          | 0.00           |
|             | ADDYA_K562_HEMIN_TREATMENT            | 70          | 0.00           |
|             | MYC_TARGETS                           | 39          | 0.00           |
|             | CARDIACEGFPATHWAY                     | 17          | 0.00           |
|             | AGED_MOUSE_HIPPOCAMPUS_ANY_DN         | 39          | 0.00           |

| <i>Diet</i> | <i>Pathway</i>                             | <i>SIZE</i> | <i>p-value</i> |
|-------------|--------------------------------------------|-------------|----------------|
|             | ADIP_HUMAN_UP                              | 59          | 0.00           |
|             | HDACI_COLON_CUR2HRS_UP                     | 26          | 0.00           |
|             | CIS_RESIST_GASTRIC_UP                      | 16          | 0.00           |
|             | STRESS_TPA_SPECIFIC_UP                     | 40          | 0.00           |
|             | HIPPOCAMPUS_DEVELOPMENT_NEONATAL           | 26          | 0.00           |
|             | RIBAVIRIN_RSV_DN                           | 43          | 0.01           |
|             | CHESLER_BRAIN_CIS_GENES                    | 50          | 0.01           |
|             | PASSERINI_INFLAMMATION                     | 24          | 0.01           |
|             | HOFFMANN_BIVSBII_LGBII                     | 90          | 0.01           |
|             | UVB_NHEK3_C6                               | 29          | 0.01           |
|             | YAO_P4_KO_VS_WT_UP                         | 65          | 0.01           |
|             | HASLINGER_B_CLL_13Q14                      | 19          | 0.02           |
|             | LINDSTEDT_DEND_UP                          | 50          | 0.02           |
|             | RORIE_ES_PNET_DN                           | 27          | 0.02           |
|             | IL1_CORNEA_UP                              | 62          | 0.02           |
|             | IDX_TSA_DN_CLUSTER3                        | 69          | 0.02           |
|             | LINDSTEDT_DEND_8H_VS_48H_UP                | 64          | 0.02           |
|             | PARK_RARALPHA_UP                           | 37          | 0.02           |
|             | KNUDSEN_PMNS_UP                            | 74          | 0.03           |
|             | DRUG_RESISTANCE_AND_METABOLISM             | 95          | 0.03           |
|             | GALINDO_ACT_UP                             | 73          | 0.03           |
|             | CPR_NULL_LIVER_DN                          | 16          | 0.03           |
|             | IRS_KO_ADIP_UP                             | 23          | 0.03           |
|             | ADIP_DIFF_CLUSTER3                         | 32          | 0.03           |
|             | AGED_MOUSE_MUSCLE_UP                       | 30          | 0.04           |
|             | CARBON_FIXATION                            | 20          | 0.04           |
|             | FETAL_LIVER_ENRICHED_TRANSCRIPTION_FACTORS | 75          | 0.04           |
|             | HINATA_NFKB_UP                             | 105         | 0.04           |
|             | TSA_HEPATOMA_UP                            | 33          | 0.05           |
|             | ZHAN_MMPC_PC                               | 22          | 0.05           |
